1 Manganese modulates metabolic activity and redox homeostasis in translationally-blocked  
2 *Lactococcus cremoris*, impacting metabolic persistence, cell-culturability, and flavor  
3 formation.

4 Avis Dwi Wahyu Nugroho<sup>1, 2, 3</sup>, Berdien van Olst<sup>1, 3, 4</sup>, Stephanie Agnes Bachtiar<sup>1, 2, 3</sup>, Sjef  
5 Boeren<sup>1, 4</sup>, Michiel Kleerebezem<sup>1, 3</sup>, Herwig Bachmann<sup>1, 2, 5\*</sup>

6 **Addresses:**

7 1 TiFN, 9A, 6709 PA Wageningen, The Netherlands

8 2 Health department, NIZO Food Research, Kernhemseweg 2, 6718 ZB Ede, The Netherlands

9 3 Host-Microbe Interactomics Group, Wageningen University & Research, De Elst 1, 6708 WD Wageningen, The  
10 Netherlands

11 4 Laboratory of Biochemistry, Stippeneng 4, 6708 WE, Wageningen University & Research, The Netherlands

12 5 Systems Biology Lab, Vrije Universiteit Amsterdam, De Boelelaan 1108, 1081 HZ Amsterdam, The Netherlands

13 Corresponding author: Bachmann, Herwig ([herwig.bachmann@nizo.com](mailto:herwig.bachmann@nizo.com))

14 **Abstract**

15 Manganese (Mn) is an essential trace element that is supplemented in microbial media with varying  
16 benefits across species and growth conditions. We found that growth of *Lactococcus cremoris* was  
17 unaffected by manganese omission from the growth medium. The main proteome adaptation to  
18 manganese omission involved increased manganese transporter production (up to 2000-fold), while the  
19 remaining 10 significant proteome changes were between 1.4 and 4 fold. Further investigation in  
20 translationally-blocked (TB), non-growing cells showed that Mn supplementation (20  $\mu$ M) led to  
21 approximately 1.5X faster acidification compared to Mn-free conditions. However, this faster acidification  
22 stagnated within 24 hours, likely due to draining of intracellular NADH that coincides with substantial loss  
23 of culturability. Conversely, without manganese, non-growing cells persisted to acidify for weeks, albeit at  
24 a reduced rate, but maintaining redox balance and culturability. Strikingly, despite being unculturable,  $\alpha$ -  
25 keto acid-derived aldehydes continued to accumulate in cells incubated in the presence of manganese,  
26 whereas without manganese cells predominantly formed the corresponding alcohols. This is most likely  
27 reflecting NADH availability for the alcohol dehydrogenase-catalyzed conversion. Overall, manganese  
28 influences the lactococcal acidification rate, and flavor formation capacity in a redox dependent manner.  
29 These are important industrial traits especially during cheese ripening, where cells are in a non-growing,  
30 often unculturable state.

31

32 **Introduction**

33 Growth and survival of microorganisms heavily relies on the environmental availability of metal cofactors,  
34 particularly for essential alkaline earth and transition metals such as magnesium, calcium, manganese,  
35 iron, cobalt, copper, and zinc. In this group, manganese is especially important because of its relatively  
36 high solubility, abundance, and distinctive redox abilities (1). In comparison to other biologically important

37 redox-active metals, i.e  $\text{Fe}^{2+}$ ,  $\text{Mn}^{2+}$  is a weaker electron donor or reducing agent (1). Consequently, cells  
38 can accumulate and tolerate high cytoplasmic concentration of free  $\text{Mn}^{2+}$  (2) without negative redox  
39 outcomes under conditions that will normally promote formation of toxic free radicals through Fenton-type  
40 reactions (3). Based on structural similarity among other transition metals, only manganese is able to  
41 replace magnesium in its cofactor binding site and activate the corresponding enzymes which are  
42 ubiquitous in carbon, nucleic acid and protein metabolism.(1, 4, 5).

43 Therefore, intracellular manganese homeostasis is essential for optimal cellular activities. In bacteria, the  
44 intracellular  $\text{Mn}^{2+}$  concentration is typically maintained relative to other metals as an inverse of the Irving-  
45 Williams series ( $\text{Mg}^{2+}$  and  $\text{Ca}^{2+}$  (weakest cofactor binding)  $< \text{Mn}^{2+} < \text{Fe}^{2+} < \text{Co}^{2+} < \text{Ni}^{2+} < \text{Cu}^{2+} > \text{Zn}^{2+}$ )  
46 (6, 7). This universal order predicts the stabilities of (transitional) metal complexes independent of the  
47 ligands (7), and highly influences the metal competition to cofactor binding sites that depends on both its  
48 abundance and affinity. To ensure specific metal cofactors are inserted to metalloenzymes, a cell finely  
49 tunes its intracellular metal pools by employing cytosolic metal sensors and transporters. In the case of  
50 manganese, two main transporters are reported in lactic acid bacteria (LAB), which are an ABC transport  
51 system (*mtsCBA*) and Nramp transporters (*mntH*) (8). Typically, intracellular manganese is maintained at  
52 micromolar levels, which is 1,000- 10,000-fold lower than intracellular  $\text{Mg}^{2+}$  but 10,000-100,000-fold  
53 higher than other metals in the Irving-Williams series, with an exception for iron that is commonly present  
54 in comparable amount to manganese (6). The maintenance of intracellular manganese levels is especially  
55 relevant for cellular bioenergetics where various enzymes related to carbon metabolism, e.g., lactate  
56 dehydrogenase, phosphoglycerate mutase & fructose-1,6-bisphosphate phosphatase are either strictly  
57 Mn-dependent or highly stimulated by manganese (1, 9). Many bacterial superoxide dismutases which act  
58 as scavenger of reactive oxygen species also incorporates manganese in their active site (10). Therefore,  
59 manganese is generally considered to be crucial not only in survival under oxidative stress conditions, but  
60 also in ATP generation (10, 11).

61 In Lactic Acid Bacteria, manganese supplementation has frequently been shown to contribute to cell  
62 growth and functionality during fermentation applications. The bioavailability of manganese has been  
63 found to enhance *in vitro* formation of flavors such as benzaldehyde (12) and the aldehydes derived from  
64  $\alpha$ -keto acids e.g. 3-methylbutanal (13). In the latter case, the conversion of branched-chain  $\alpha$ -keto acids  
65 (BCAAs) was reported to serve as a redox sink and the utilization of BCAAs can result in a marked increase  
66 of biomass, possibly due to additional ATP formation (14). On the other hand, lactococci grown without  
67 manganese supplementation have shown higher survival following a heat shock (15). Although the  
68 underlying mechanism to this observation is not known, it is plausible that manganese deprivation leads  
69 to stress responses that provide cross-protective resistance (16). Nonetheless, manganese

70 supplementation is generally favored for microbial cultivation media despite these variations in  
71 physiological consequences in various species and growth conditions (17). While various studies have  
72 investigated the effect of manganese on growth and stress resistance, no studies investigated its effect  
73 on the metabolism of non-growing cells, which have distinct metabolic strategies and requirements. A  
74 non-growing state is commonly encountered in various biotechnological applications such as in the  
75 production of pharmaceuticals (18, 19), fermented foods (20), or biofuels (21). It is especially relevant in  
76 various long-term fermentation processes such as cheese ripening where a significant portion of volatile  
77 flavor metabolites are generated for up to years after cell growth has ceased.

78 In the present study, we investigated the physiological and molecular (proteome) adaptation of  
79 *Lactococcus cremoris* to the presence and absence of manganese supplementation to a chemically defined  
80 medium. Furthermore, we investigated the role of manganese in cellular survival and metabolic activity in  
81 growing and translationally-blocked (TB) cells. The results indicate that cells in the absence of manganese  
82 can maintain their growth rate with relatively modest adjustment in cytoplasmic proteins compared to  
83 membrane transporters. However, in non-growing, TB-cells manganese omission led to a striking  
84 prolongation of acidification capacity, cell-survival as well as maintenance of redox homeostasis. These  
85 observations demonstrate that manganese omission strongly influences the *L. cremoris* metabolism under  
86 TB conditions, while it does not appear to have apparent consequences for growth or physiology of *L.*  
87 *cremoris* during cultivation.

## 88 **Methods**

### 89 **Strain and Mn-omission cultivation**

90 *Lactococcus cremoris* NCD0712 (22), MG1363 (pNZ5519), MG1363 (pAK80) (23),  
91 MG1363(pCPC75::atpAGD) (23), and MG1363 (pNZ5519) (this study, Supplementary Methods 1) were  
92 grown on chemically defined medium for prolonged cultivation (CDMPC) (24) at 30°C without aeration.  
93 Strains were pre-cultured in the presence or absence of Mn for 25 generations (4 direct transfers with a  
94 100-fold dilution) to minimize carry-over effects. Details on strain-specific ingredients and growth rate  
95 measurement and can be found in Supplementary Methods 2 and 3.

### 96 **Proteome analysis**

97 Proteome samples were harvested in quadruplicates from exponentially growing cultures of strain  
98 NCD0712 that was precultured for 20 generations in the presence or absence of manganese. Protein  
99 extraction and analysis were performed as described previously (25). Details and modifications to the  
100 proteomics methods can be found in Supplementary Methods 4. The mass spectrometry proteomics data

101 have been deposited to the ProteomeXchange Consortium via the PRIDE (26) partner repository with  
102 the dataset identifier PXD030123

### 103 **Acidification and luminescence measurements of TB-cells**

104 Long term analysis of metabolite production was performed as described earlier (27). Exponentially  
105 growing cells pre-cultured in the presence or absence of Mn were harvested and resuspended at a density  
106 between 1E+07 and 2.5E+07 cells/mL in their corresponding growth medium supplemented with  
107 erythromycin (5µg/mL) and 10µM 5(6)-carboxyfluorescein (Sigma-Aldrich 21877), with or without Mn  
108 (20µM). For volatile production measurement, aliquots of TB-cultures were transferred to sterile GC-MS  
109 vials. Time-course samples were analyzed for organic acids, volatiles, viability, and membrane integrity  
110 (Supplementary Methods 5 and 6)

111 Luminescence measurement was performed as described earlier (28). Aliquot of TB-*L. lactis* MG1363  
112 harbouring pNZ5519 (1E+07 cells/mL, precultured without manganese) was concentrated at selected time  
113 points of incubation by centrifugation and resuspension in less volume of supernatant to a concentration  
114 of 1E+08 cells/mL. Nonanal 1% in silicon oil was supplied as reaction substrate and added either into  
115 empty wells or the empty space between the wells of the microplate. Luminescence was determined at  
116 20-min intervals over a period of 6 hours after nonanal addition in a Genios microplate reader (Tecan,  
117 Zurich, Switzerland). The gain was set at 200 and integration time was set at 1000 ms.

## 118 **Results**

### 119 **1. Manganese omission did not lead to changes in growth characteristics or** 120 **metabolic end products**

121 Growth rate changes in many organisms are accompanied by metabolic shifts and they are suggested to  
122 reflect re-allocations in cellular protein investment and constraints on microbial growth (29, 30). In *L.*  
123 *lactis* such metabolic shift has been described, where homofermentative acidification predominated by  
124 lactic acid occurs at high growth rate but switches to heterofermentative acidification at low growth rate  
125 (31). To investigate the requirement of manganese on growth, we removed manganese from the  
126 preparation of our standard chemically-defined medium for lactococci. Remarkably, changes in the growth  
127 of strain NCDO712 was not detected in the absence of manganese. Since a carry-over effect from the  
128 previous growth medium might be sufficient to compensate for the lack of manganese, we further  
129 cultivated NCDO712 for 4 subcultures and a total of 25 generations to ensure complete removal of  
130 manganese. At the end of this subculturing, no apparent effect on the growth rates of NCDO712 was seen

131 in relation to manganese availability (Figure 1A). The growth rate remained high in the absence of  
132 manganese throughout the transfers and under excess or limited supply of lactose (Supplementary Figure  
133 S1), which implies that cells can grow with minute amounts of manganese available in their environment.  
134 In line with the high growth rate, the composition of produced organic acids remained unchanged and was  
135 predominated by lactic acid when manganese was omitted (Figure 1B). These results suggest that Mn  
136 omission lead to no changes in flux (32) through the central energy generation pathway, i.e., glycolysis  
137 coupled to pyruvate conversion to lactic acid by lactate dehydrogenase (LDH), nor in the energy and redox  
138 state of the cells i.e., ADP/ATP ratio, or NAD<sup>+</sup>/NADH ratio (33).  
139

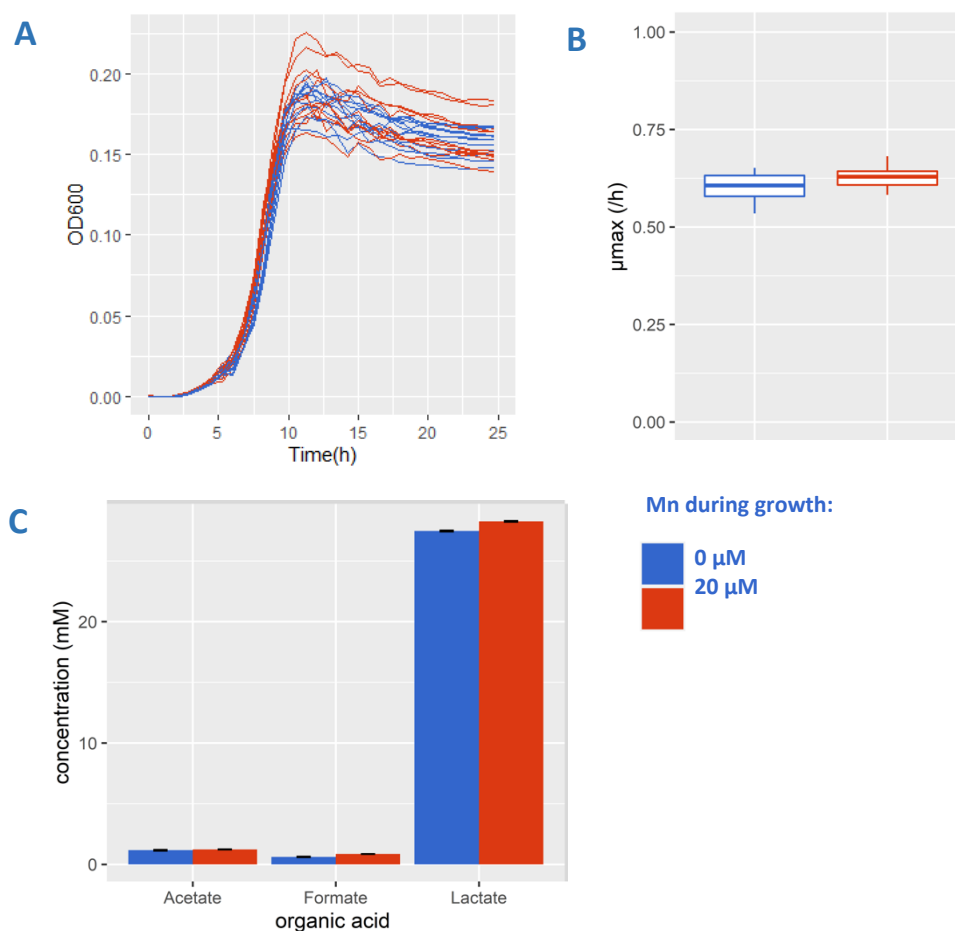

140  
141  
142  
143  
144  
145  
146  
147  
148

**Figure 1** *Lactococcus lactis* NCD0712 was serially propagated 4 times (25 generations) in defined medium supplemented with lactose at excess (12.5 mM – growth stops due to acid accumulation) concentration in the presence (red) and absence (blue) of manganese (20μM). The growth curve (panel A, n=8), maximum specific growth rate (panel B, n=3) and concentrations of organic acids (panel C, n=2) are shown. Error bars indicate the standard deviation from the stated n biological replicates.

## 149 2. Proteome adjustments to manganese omission mainly up-regulated Mn 150 transporters

151 Growth data suggests that cells are apparently unaffected by manganese deprivation. To characterize the  
152 cellular responses to manganese omission from the growth medium, we performed a global proteome  
153 analysis. Manganese omission led to only 17 significantly differentially expressed proteins, encompassing  
154 11 up-regulated and 6 down-regulated expression levels (Table 1). By far the most prominent proteome  
155 adaptation occurred in the expression of membrane transporters such as MntH, MtsA, and MtsB. There an  
156 up to 2000-fold increase of expression was observed for the ABC transporter MtsA upon the omission of  
157 manganese. The expression of proton dependent NRAMP-related manganese transporter MntH (plasmid  
158 encoded) increased under manganese omission by 4-fold. Next to these transporters, the putative  
159 manganese transporter *lmg\_1024* and *lmg\_1025* increased by 4-fold. This is comparable to the fold-  
160 change observed for MntH and it may potentially be involved in the regulation of intracellular Mn  
161 concentration. Additionally, the genome-encoded MntH (*lmg\_1490*) was not captured by differential  
162 analysis (Table 1) due to its level being below the detection limit with Mn supplementation. When taking  
163 into account the estimated minimum detection level in our proteomics data (4.8 LFQ intensity), this  
164 genome-encoded MntH increased by at least 20-fold upon Mn omission to an average LFQ intensity of 6.1,  
165 which is comparable with the upregulation of plasmid-encoded MntH<sub>P</sub> (Supplementary Table S1). The  
166 upregulation of these Mn transporters indicates that cells detected Mn shortage despite no apparent  
167 changes in growth rate or acidification profile. However, it cannot be excluded that trace amounts of Mn  
168 that might be present as contaminants of medium constituents are compensating or masking any effects  
169 of Mn omission on growth. Moreover, it is unknown whether the upregulated transport functions would  
170 allow the cells to accumulate these trace amount to a sufficient intracellular level for growth.

171 Aside from these transporters, manganese omission also led to 12 more modest, but significant changes  
172 in cytoplasmic protein levels (ranging from 1.4 and 4-fold changes). Notably, the majority of these  
173 proteins are associated with redox metabolism and many catalyze NAD-dependent reactions. Manganese  
174 omission from the growth medium increased the expression of 2-dehydropantoate 2-reductase (3-fold)  
175 and a putative pyridoxamine 5'-phosphate oxidase (2.5-fold), while the expression of NADH oxidase (0.27-  
176 fold), aldehyde-alcohol dehydrogenase (0.41-fold), and a putative ferredoxin protein (0.48-fold)  
177 decreased. Moreover, manganese availability seems to correspond to changes in a few proteins related to  
178 stress response. For example, expression of the peptide methionine sulfoxide reductase (PMSR), which  
179 catalyzes the reduction of methionine sulfoxide in proteins back to methionine. This enzyme may protect  
180 cells against oxidative stress (34). It was found to be approximately 2-fold decreased in the absence of  
181 manganese. Conversely, manganese omission led to more than 3-fold increased expression of universal

182 stress protein UspA, which is associated with resistance against various stresses. Intriguingly, aside from  
183 PMSR, differential expression of superoxide dismutase (MnSOD) and/or other oxidative stress related  
184 functions (Supplementary Table S1) were not observe in the absence of manganese, illustrating a lack of  
185 prominent changes in the oxidative stress levels experienced by these cells. Overall, the changes in  
186 proteome data are dominated by major changes in Mn-transport proteins, and more modest changes in a  
187 number of cytosolic proteins that suggest that cells might experience a shift in the redox balance.

188 **Table 1** Significant differentially expressed proteins in manganese omitted compared to manganese supplemented cultures. Proteins were selected based on  
 189 cutoff parameters of  $s_0 = 0.01$  and a False Discovery Rate (FDR) of 0.05. LFQ (Label Free Quantitation) values represent the average from 4 biological  
 190 replicates.

| Protein names                                                                                    | Gene names          | LFQ (+Mn) | LFQ (-Mn) | Fold Change | P-value |
|--------------------------------------------------------------------------------------------------|---------------------|-----------|-----------|-------------|---------|
| Manganese ABC transporter substrate binding protein                                              | mtsA limg_1138      | 4.9±0.04  | 8.26±0.11 | 2269.43     | 0.00000 |
| Manganese ABC transporter ATP binding protein                                                    | mtsB limg_1136      | 5.72±0.22 | 7.77±0.1  | 110.67      | 0.00001 |
| Mn <sup>2+</sup> /Fe <sup>2+</sup> transporter, NRAMP family                                     | mntH pNZ712_01      | 6.43±0.13 | 7.05±0.04 | 4.19        | 0.00021 |
| Uncharacterized protein                                                                          | limg_1025           | 6.5±0.1   | 7.12±0.04 | 4.15        | 0.00007 |
| Putative membrane protein                                                                        | limg_1024           | 6.4±0.09  | 6.97±0.03 | 3.78        | 0.00005 |
| Universal stress protein UspA                                                                    | UspA                | 7±0.05    | 7.5±0.06  | 3.20        | 0.00003 |
| 2-dehydropantoate 2-reductase (EC 1.1.1.169) (Ketopantoate reductase)                            | panE limg_1131      | 5.52±0.15 | 5.99±0.08 | 2.99        | 0.00324 |
| Uncharacterized protein                                                                          | limg_2395           | 5.7±0.1   | 6.11±0.07 | 2.55        | 0.00120 |
| Ribonuclease J (RNase J) (EC 3.1.-.-)                                                            | rnj limg_0876       | 7.2±0.01  | 7.51±0.07 | 2.02        | 0.00024 |
| Lipoprotein                                                                                      | plpB limg_0336      | 6.82±0.03 | 7.06±0.05 | 1.75        | 0.00050 |
| Ribonuclease J (RNase J) (EC 3.1.-.-)                                                            | rnj limg_0302       | 7.32±0.02 | 7.47±0.03 | 1.40        | 0.00063 |
| NADH oxidase (EC 1.6.-.-)                                                                        | noxC limg_1770      | 6.76±0.14 | 6.19±0.11 | 0.27        | 0.00171 |
| Aldehyde-alcohol dehydrogenase                                                                   | adhE limg_2432      | 8.1±0.05  | 7.72±0.13 | 0.41        | 0.00294 |
| Putative electron transport protein                                                              | limg_1916           | 6.9±0.1   | 6.58±0.04 | 0.48        | 0.00229 |
| Peptide methionine sulfoxide reductase MsrA (Protein-methionine-S-oxide reductase) (EC 1.8.4.11) | pmsR msrA limg_2281 | 6.25±0.06 | 5.97±0.07 | 0.52        | 0.00197 |
| Glycine betaine/proline ABC transporter (EC 3.6.3.32)                                            | busAA limg_1048     | 8.17±0.04 | 7.92±0.02 | 0.56        | 0.00006 |
| Glycine betaine-binding protein                                                                  | busAB limg_1049     | 7.7±0.03  | 7.46±0.02 | 0.59        | 0.00002 |



192 **3. Acidification is maintained for a prolonged period in TB-cells only in the**  
193 **absence of manganese**

194 The proteome data implied that cells cultured without Mn addition might be in an altered physiological  
195 state, which may depend on the intracellular Mn levels and/or NAD<sup>+</sup>/NADH availability to maintain  
196 metabolic fluxes. We investigated if cellular adaptation to manganese omission affects central metabolism,  
197 which we performed in a previously described model system of non-growing cells with inhibited protein  
198 synthesis (Nugroho, Kleerebezem, and Bachmann 2020). In this system we can follow acid production of  
199 non-growing cells with continuous measurements for up to three weeks. Inhibition of protein synthesis  
200 with the antibiotic erythromycin enables the preservation of protein levels, e.g., manganese transporters.  
201 It allows comparing of cells grown in the presence or absence of manganese, while manganese  
202 concentration in the assay medium can be precisely adjusted. In line with the growth data, lactic acid was  
203 still the predominant fermentation end-product, making up more than 90% (Cmol-based) of the produced  
204 organic acids (Supplementary Figure S2A) during prolonged incubation irrespective of the treatments. The  
205 calculated lactic acid production from the continuous pH measurement (Figure 2B) is in good agreement  
206 with the HPAEC measurements (Figure 2A).

207 In the presence of manganese, acidification by TB-cells was initially approximately 1.5-fold faster  
208 (Supplementary Figure S2B) but stagnated within 24 hours (Figure 2A & 2B, left panel) reaching a  
209 relatively low final lactate concentration (~ 4 mM), and a final pH of 6.16. In contrast, when cells were  
210 transferred to assay medium containing no manganese, acidification continued at a lower rate for more  
211 than a week, reaching drastically higher final lactic acid concentrations (~ 25 mM) and a lower final pH of  
212 ~ 4.0. The latter conditions (25mM lactic acid and pH 4.0) are likely the environmental conditions that  
213 prevented further acidification (Figure 2A, 2B). Moreover, in the absence of Mn in TB-cell assay (Figure  
214 2B), Mn-precultured cells produced 20 mM lactic acid in 100h compared to 150h when cells were  
215 precultured without Mn, potentially as a result of trace amount of Mn carry over. Importantly, these results  
216 demonstrate that the absence of manganese in these acidification assays prominently changes the  
217 persistence of flux through the central energy-generating pathway. This seems to be irrespective of the  
218 accompanying cellular proteome changes as demonstrated by preculture both in the presence or absence  
219 of Mn showing prolonged activity following transition to Mn-omitted non-growing assay medium (Figure  
220 2A,2B middle and right panel). Despite of the prominent role of manganese in oxidative stress tolerance  
221 in many organisms, there were no indications that this stagnated acidification was explained by substantial  
222 difference in oxidative stress levels in the absence or presence of Mn in this TB assay (Supplementary  
223 Figure S3). Overall this data shows that the omission of manganese during sugar conversion of

224 translationally blocked cells allows for a much longer persistence of acidification and therefore a higher  
 225 total product formation.

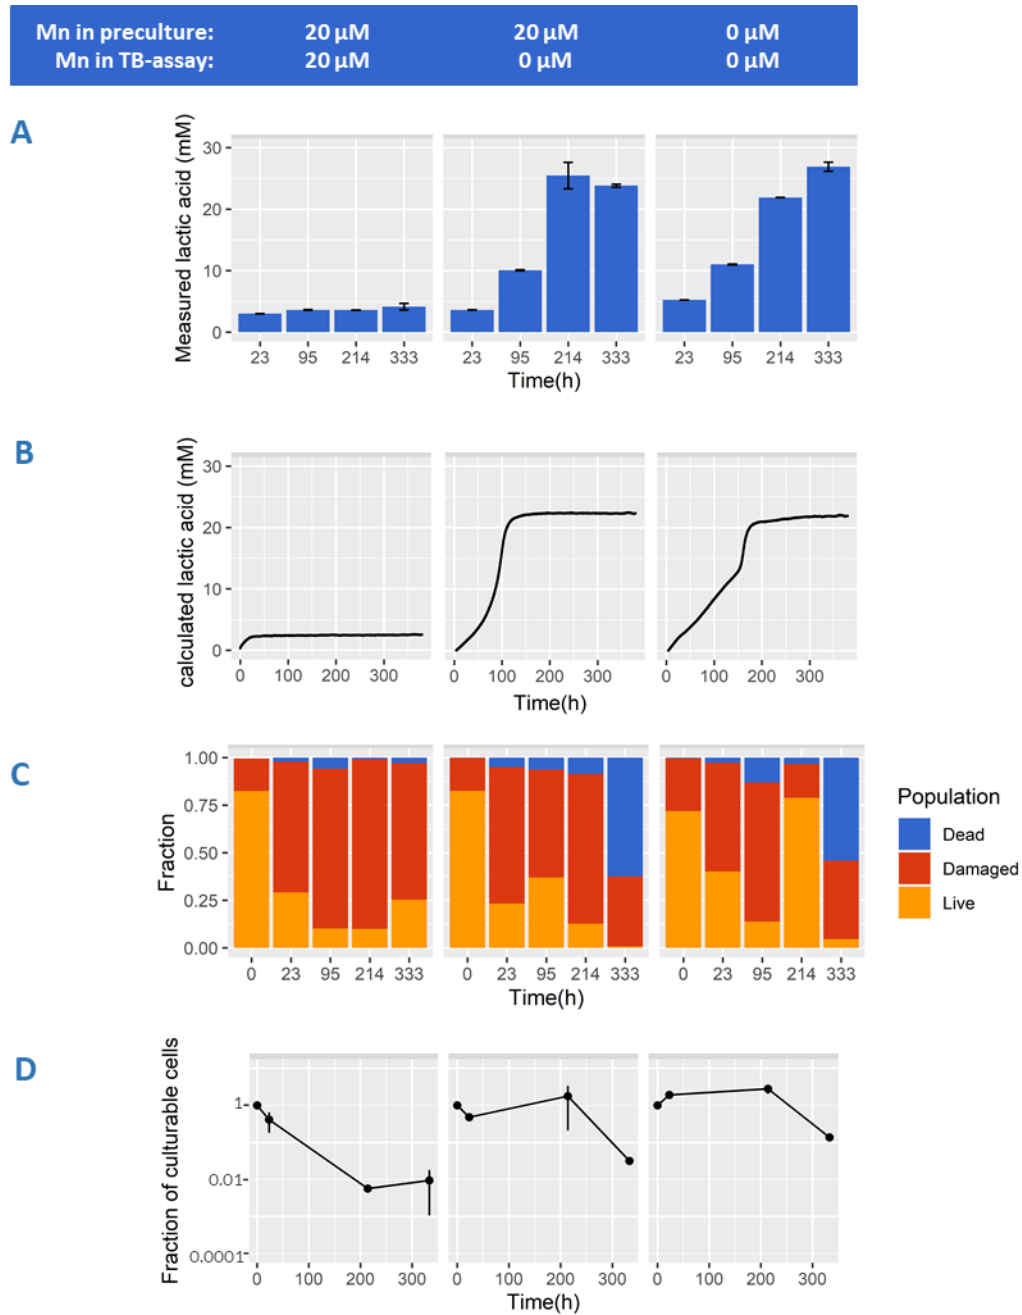

226

227 **Figure 2** *Lactococcus lactis* NCD0712 was precultured in the presence (left and middle panel) and  
 228 absence (right panel) of manganese (20 $\mu$ M). Cells ( $2.5E+07$  cells/mL) were transferred into fresh medium  
 229 containing erythromycin (5 $\mu$ g/mL) and 20 $\mu$ M manganese (left panel) or 0 $\mu$ M manganese (middle and right  
 230 panel). Concentration of lactic acid (panel A) was measured with HPAEC at selected time points.  
 231 Continuous measurement of medium pH to calculate lactic acid production overtime can be seen in panel  
 232 B. Average population fractions based on membrane integrity (panel C) was measured for dead (blue),

233 damaged (red), and live (orange) cells throughout incubation. Fractions of culturable cells based on plate  
234 counts can be seen in panel D. Error bars indicate the standard deviation from 3 biological replicates.

235

#### 236 **4. Manganese induces the appearance of viable but non-culturable (VBNC)**

#### 237 **populations in TB-cells after acidification stagnates**

238 The observed stagnation of acidification within 24 hours for Mn supplemented conditions implies that the  
239 generation of ATP through glycolysis would also stagnate, which could also affect the viability and integrity  
240 of the cells. In this context it is relevant to note that *L. lactis* is known to remain metabolically-active for  
241 prolonged periods of carbon starvation, e.g., more than 3.5 years, in a viable but non-culturable (VBNC)  
242 state (36). To investigate the influence of manganese on cellular integrity and culturability during  
243 acidification in TB-cells, we determined the colony forming unit and membrane integrity over time. Within  
244 9 days of prolonged incubation, non-growing cells incubated with manganese showed an approximate  
245 100-fold reduction in culturable cells (Figure 2D). This is sharply contrasted by results obtained for cells  
246 incubated without manganese, where culturability was maintained close to 100% in the same timeframe.  
247 Under the conditions used, rapidly declining culturability of the cells incubated in absence of manganese  
248 was only observed after 2 weeks of incubation, which is likely the consequence of the combined stress of  
249 low pH and increased lactic acid concentrations. These results are in good agreement with our previous  
250 observations that an approximate 40-fold decline of viability was observed under similar conditions after  
251 approximately 2 weeks (27). Analogous to the acidification observations presented above, the presence  
252 or absence of manganese during the preculturing and the corresponding proteome adaptations did not  
253 significantly influence the culturability results we obtained.

254 Membrane integrity analysis (Figure 2C) of the same time series revealed a prominent decline of the  
255 subpopulation with an apparent intact membrane ("live") that increasingly progressed towards the  
256 subpopulation characterized by slightly damaged ("damaged") or severely damaged ("dead") membrane  
257 integrity over the course of incubation. Under all conditions, the damaged subpopulation became more  
258 predominant over time and on average ranged from 60% to 80% of the total population in cells incubated  
259 between 23h and 214h. Notably, in the absence of manganese the subpopulation classified as 'dead'  
260 increased to approximately 60% of the total population after 333h of incubation, whereas less than 5% of  
261 the total population was classified as 'dead' when incubated for the same time in media containing  
262 manganese. Analogous to the culturability results, this drastic decline of viability is likely due to prolonged  
263 exposure to low pH and high lactic acid concentrations inducing increasing cell damage that coincides with  
264 loss of culturability (and viability). Conversely, the observed decline in culturability of cells incubated in  
265 the presence of Mn was very poorly reflected by an increasing subpopulation of cells characterized as

266 'dead' according to these membrane-staining procedures. Apparently, the loss of culturability of these  
267 cells is not related to loss of cellular integrity but could be related to an unbalanced metabolism because  
268 of their high rate of acidification. Potential metabolic consequences of rapid acidification could induce  
269 stagnation of acidification and loss of culturability. This could be related to an excessive increase of the  
270 ATP/ADP balance, where the depletion of the intracellular ADP pool halts glycolytic flux. Alternatively, the  
271 disruption of the intracellular redox balance (NADH/NAD<sup>+</sup> ratio) could lead to depletion of either form of  
272 this cofactor that would also effectively halt glycolytic flux and/or lactate formation. Loss of either ATP/ADP  
273 or NADH/NAD<sup>+</sup> homeostasis may also negatively affect culturability by creating an inability to re-initiate  
274 energy-generation or biosynthesis pathways required for regrowth.

275

## 276 **5. Manganese leads to NADH depletion in acidifying TB-cells**

277 To investigate whether manganese induces the proposed ADP depletion and thereby stagnates  
278 acidification in TB-cells, we used strain MG1363 (a prophage-cured and plasmid-free derivative of strain  
279 NCDO712) harbouring pCPC75::atpAGD (23). This strain constitutively overexpresses the F(1) domain of  
280 the membrane-bound F(1)F(0)-ATPase, which modulates intracellular energy levels by accelerating the  
281 ATP to ADP conversion (23). However, in the presence of manganese TB-cells of this F(1)-ATPase  
282 overexpressing strain displayed the same stagnation of acidification within 24 hours as the control strain  
283 (MG1363 harbouring the empty vector pAK80), whereas manganese omission allowed continued  
284 acidification at a reduced rate for weeks (Figure 3A). These results demonstrated that preventing the  
285 postulated ATP accumulation by its conversion to ADP through the F(1)-ATPase failed to sustain prolonged  
286 acidification. This indicates that the disruption of the ATP/ADP homeostasis is not the mechanism  
287 underlying the observed phenomenon.

288 To investigate whether a redox balance disruption is able to explain the manganese-induced  
289 stagnation of acidification, we used strain MG1363 harbouring pNZ5519 (37) which constitutively  
290 expresses *luxAB*, a bacterial luciferase of *Vibrio harveyi*. This luciferase catalyzes the reaction of a long  
291 chain aldehyde, e.g., nonanal, oxygen, and reduced flavin mononucleotide (FMNH<sub>2</sub>) to form a carboxylic  
292 acid, FMN, and light (490 nm). Regeneration of intracellular FMNH<sub>2</sub> is dependent on the availability of  
293 NADH, which is thereby required to maintain the luciferase reaction and the corresponding detection of  
294 the luminescence signal. In an initial experiment, the LuxAB substrate nonanal was provided immediately  
295 after transferring cells to the TB acidification conditions. In this experiment, the initial luminescence signal  
296 was approximately equal in absence and presence of manganese, and subsequently declined over time,  
297 to become undetectable after approximately 6 hours (Figure 3B). This result indicates that the high NADH  
298 demand of the luminescence reaction effectively drains the cellular NADH pool, which leads to the rapid  
299 decline of the luminescence signal over time. Notably, the decline rate of the luminescence signal was

300 higher when manganese was supplemented and reached undetectable luminescence levels 2 hours earlier  
301 compared to the condition when manganese was omitted, suggesting that NADH is depleted more rapidly  
302 when manganese is present. In a follow up experiment, TB-cell suspensions were left to acidify for 20  
303 hours prior to the addition of nonanal to initiate the luminescence reaction (Figure 3B). Under these  
304 conditions, the impact of manganese presence in the incubation medium was very pronounced, where the  
305 condition lacking manganese generated an initial luminescence level and a subsequent signal-decline curve  
306 that were very similar to those observed when nonanal was added from the start, whereas in the presence  
307 of Mn there was hardly any detectable luminescence signal (Figure 3B). These results suggest that NADH  
308 is depleting during acidification in the presence of Mn, whereas intracellular levels of NADH and redox  
309 homeostasis are maintained in the absence of manganese. Taken together these experiments show that  
310 manganese-mediated acceleration of acidification correlates with a disruption of redox homeostasis rather  
311 than energy homeostasis (ATP/ADP), leading to depletion of NADH and thereby stagnating acidification  
312 and possibly inducing a VBNC state. This loss of redox homeostasis is not seen in absence of manganese  
313 where NADH pools are apparently kept constant and acidification can be sustained for weeks (27) in these  
314 TB-cell suspensions.  
315

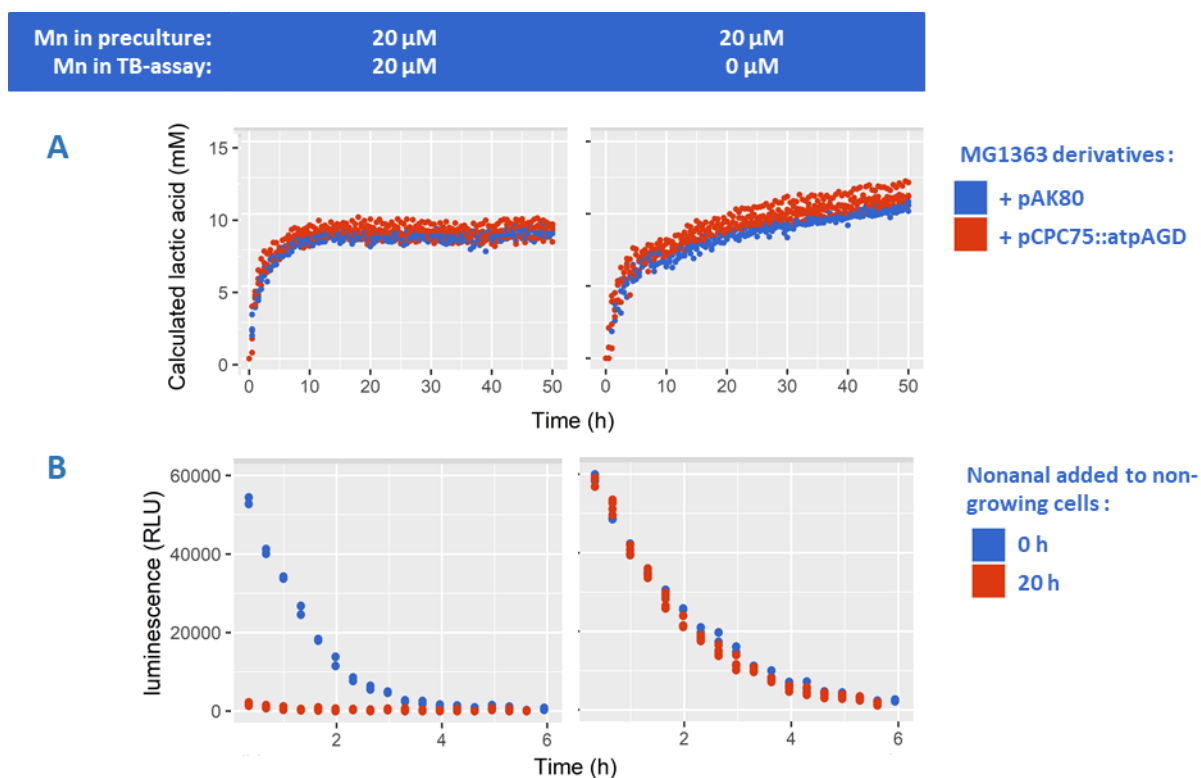

316

317 **Figure 3** Cells precultured with 20 $\mu$ M Mn were transferred into TB assay with 20 $\mu$ M Mn (left column) or  
318 0 $\mu$ M Mn (right column). (Panel A) *Lactococcus cremoris* MG1363 that harbors empty vector pAK80 (upper)  
319 or F1-ATPase encoding pCPC75::atpAGD (lower) at 2.0E+07 cells/mL were analyzed for continuous  
320 measurement of medium pH to calculate lactic acid production overtime. (Panel B) *Lactococcus lactis*  
321 MG1363 (pNZ5519) encoding bacterial *luxAB* luciferase was analysed for luminescence signal maintenance

322 when starting the reaction after 0h (blue) and 20h (red) of incubation with TB. Cells were incubated at  
323 1.0E+07 cells/mL and concentrated to 1E+08 cells/mL prior to luminescence detection. Experiment was  
324 carried out at least with 3 biological replicates.

325

## 326 **6. NADH-dependent conversion of aldehydes to alcohols increases in TB-cells** 327 **upon manganese omission.**

328 Next to acidification, NADH depletion might influence or re-route other (industrially-relevant) metabolic  
329 pathways that are dependent on the redox state of the cell, such as branched-chain amino acid catabolism.

330 This catabolic pathway is initiated by the transamination of the amino acid leading to the formation of the  
331 corresponding  $\alpha$ -keto-iso-caproic acid (KICA), which serves as the major metabolic precursor that can be  
332 converted to 3 different intermediate products. Only the keto acid conversion to the corresponding  
333 aldehyde intermediate, e.g., 3- or 2-methylbutanal, is independent of NAD<sup>+</sup> or NADH as a cofactor and is  
334 also enhanced by Mn (13). The other keto acid conversions include the NADH-dependent conversion to  $\alpha$ -  
335 hydroxyisocaproic acid via hydroxyacid dehydrogenase and the NAD<sup>+</sup> and CoA dependent conversion to  
336 isocaproyl-CoA via ketoacid dehydrogenase.

337 Volatile analysis from TB-cultures shows that the production of 3- and 2-methylbutanal within the first 23  
338 to 95 hours was comparable throughout all conditions (Figure 5). However, in the presence of Mn, 3- and  
339 2-methylbutanal continued to accumulate during 2 weeks of incubation to reach an average peak area of  
340 7.5E+06 (arbitrary unit), which is approximately 3-fold higher than the maximum level reached in the  
341 absence of Mn. In contrast, BCAA-derived aldehydes were not further accumulating after the first 23 hours  
342 in absence of Mn, and actually declined after 95 hours, suggesting their utilization in aldehyde-consuming  
343 reactions. A known reaction for aldehyde conversion leads to formation of the corresponding alcohol (3-  
344 and 2-methylbutanol) catalyzed by aldehyde-alcohol dehydrogenase, which is NADH dependent. We found  
345 that in the absence of manganese, the maximum peak area of 3-methylbutanol and 2-methylbutanol were  
346 increased approximately 10-fold and 5-fold, respectively, in the conditions without manganese compared  
347 to those where manganese was supplemented. In the presence of Mn, it is apparent that the reaction  
348 cascade stalls at the aldehyde formation, and fails to convert to the alcohol, which agrees with the  
349 proposed NADH depletion.

350

|                   |            |            |           |
|-------------------|------------|------------|-----------|
| Mn in preculture: | 20 $\mu$ M | 20 $\mu$ M | 0 $\mu$ M |
| Mn in TB-assay:   | 20 $\mu$ M | 0 $\mu$ M  | 0 $\mu$ M |

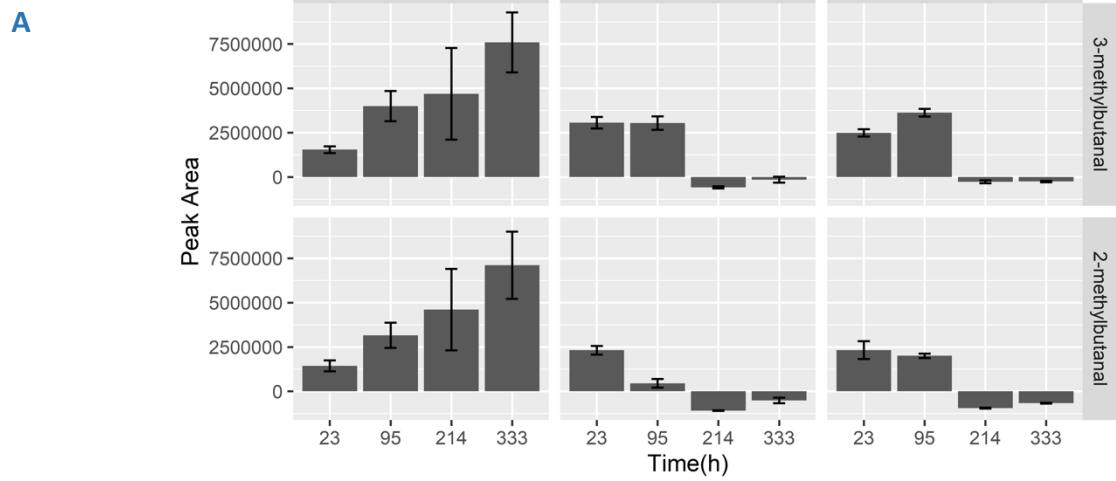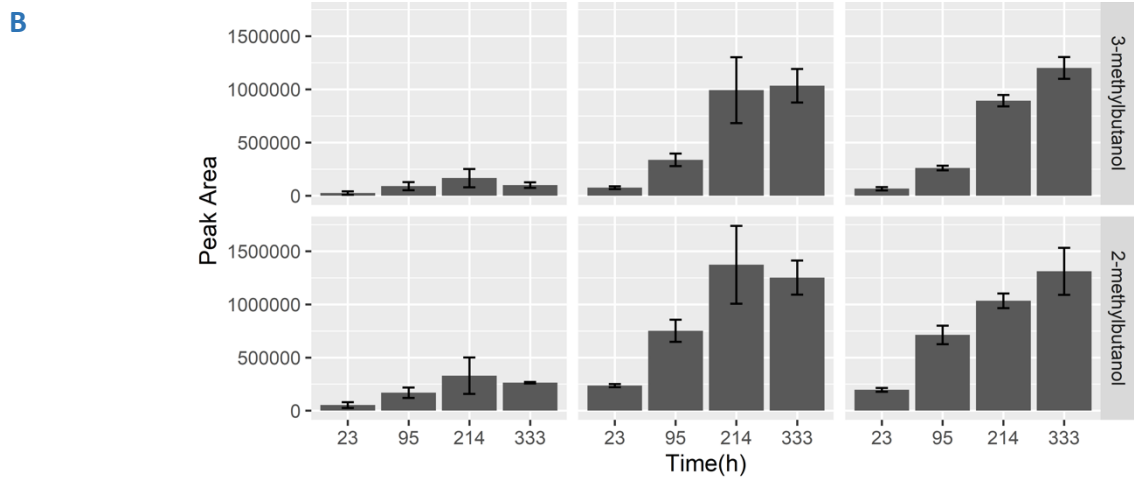

351

352 **Figure 5** *Lactococcus lactis* NCDO712 was precultured in the presence (left and middle panel) and absence  
353 (right panel) of manganese (20 $\mu$ M). Cells ( $2.5E+07$  cells/mL) were transferred into fresh medium  
354 containing erythromycin (5 $\mu$ g/mL) and 20 $\mu$ M manganese (left panel) or 0 $\mu$ M manganese (middle and right  
355 panel). GC-MS peak areas of 3-methylbutanal and 2-methylbutanal (panel A) as well as 3-methylbutanol  
356 and 2-methylbutanol (panel B) were measured throughout incubation. Error bars indicate the standard  
357 deviation from 3 biological replicates.

358

359

## 360 Discussion

361 In this study, we evaluated how manganese influenced the physiology of *L. lactis*, and show that  
362 manganese omission from the growth medium did not impose a measurable growth rate reduction, while  
363 bringing a substantial survival advantage upon translational blocking. We observed that the adaptation of  
364 the cellular proteome to growth conditions that lack manganese mainly involves the upregulation of Mn  
365 importers. This may allow for the accumulation of minute levels of Mn contaminations from medium  
366 constituents inside the cell to achieve Mn levels that support a high growth rate. Although we did not  
367 determine intracellular Mn concentrations, it has previously been reported that *Lactococcus lactis* MG1363,  
368 accumulated up to 0.7 mM Mn intracellularly during growth in the medium that was also employed in this  
369 study (38). The study implied that manganese is required for lactococcal enzyme activities, making our  
370 finding that we can omit this metal from the medium without consequences in terms of growth or central  
371 energy metabolism even more striking. In addition, the results we report here are also contrasting the  
372 apparent dependency for Mn in other lactic acid bacteria species, to sustain rapid growth and oxygen  
373 tolerance (39, 40).

374 Cytoplasmic manganese is important in lactococci, which is supported by the extensive transport systems  
375 dedicated for Mn homeostasis. Four Mn transport systems were suggested from the MG1363 genome  
376 which includes the chromosomal NRAMP-family transporter (encoded by *mntH*), an ABC  
377 transporter (encoded by *mtsAB* -- see below), and the putative Mn-Fe importer (encoded by *llmg1024-*  
378 *1025* - see below). Additionally, *L. lactis* strain NCDO712 used in this study also harbors 6 plasmids, one  
379 of which encodes an extra copy of NRAMP-family transporter *MntHp* (encoded by *mntHp*). Next to the  
380 characterized transport systems, the proteins encoded by *llmg\_1024-1025* (domain PF01988; detected  
381 with E-value 3.1E-41 and 3.1E-40, respectively) show the presence of a VIT1 domain that is also found in  
382 various Fe<sup>2+</sup>/Mn<sup>2+</sup> import systems. The upregulation we found for these genes support the role of this  
383 protein in Mn import. From an evolutionary perspective, dairy lactococci need to acquire manganese, of  
384 which the availability is limited in their natural environment. In bovine milk, Mn concentrations are  
385 reported to vary between 4 and 6.5  $\mu$ M (41) which is in the same order of the concentration supplied in  
386 the present study. The total concentration of Mn in cheese was found at a similar level, which was between  
387 5 and 20  $\mu$ mole per kg cheese (42), but its bioavailability might be influenced by the pH, salt concentration,  
388 association with other (metal) ions or casein micelles, water activity and various other factors (43). The  
389 availability of redundant transporter systems are likely to ensure sufficient uptake under dynamic  
390 environmental conditions.



391 It was unexpected that in non-growing cells, we found that manganese supplementation at a physiological  
392 concentration for growth led to rapidly stagnating acidification and a culturability decline. This effect on  
393 acidification may result from the manganese-mediated modulation of the activity of enzymes in the central  
394 energy generating pathway. Within this metabolic pathway, various enzymes were reported to be  
395 dependent or activated by manganese such as. FBPase, PGM and LDH (1, 9, 44). As a result, manganese  
396 addition might affect the homeostasis of this pathway. The balance of ADP/ATP and NAD<sup>+</sup>/NADH are  
397 especially important as both have been implicated in controlling metabolic flux as well as fermentation  
398 end-product profiles from homolactic to mixed acids (33, 45). We demonstrated that in our setup the  
399 effects on central metabolism were associated with NAD<sup>+</sup>/NADH rather than ADP/ATP disbalance.

400 Manganese deficiency might not be fully compensated by overproduction of Mn importers as demonstrated  
401 by the changes of NADH-utilizing enzymes in the absence of Mn. If NADH is a rate-limiting factor, such  
402 changes might be an effort to tune the flux through those reactions and thereby preventing an excessive  
403 drain of the intracellular NADH pool. Alternatively, regulating the level of these enzymes at low intracellular  
404 NADH concentrations may be necessary to maintain their flux at the required level. In contrast,  
405 translational blocking disallows proteome changes that may serve as cell's coping mechanism against NAD  
406 imbalance. Without proteome adjustment, a slight disbalance in NAD(H) regeneration might lead to a  
407 substantial depletion of NAD(H) over a prolonged period of time, which potentially explains the stagnating  
408 acidification of non-growing cells. Consequently, the lack of NADH also blocks other pathways that rely on  
409 its availability such as alcohol production in BCAA catabolism as well as FMN<sub>2</sub> regeneration required for  
410 luminescence reaction (Figure 6). Nevertheless, it is remarkable that the long term conversion of keto  
411 acids to aldehydes in this study was maintained even when central energy-generating pathway has halted  
412 for an extended period, implying that cells are likely to maintain a sufficiently high energetic state to  
413 import amino acids and that NADH depletion rather than ATP depletion corresponds to the emergence of  
414 VBNC state. In yeasts, it has been reported that NAD(P)H depletion is associated with VBNC state resulting  
415 from sulfite exposure (46, 47). In non-growing cells of retentostats, where the carbon source is  
416 continuously supplied albeit rapidly utilized (48), the production of various aldehydes from amino acid  
417 degradation such as benzaldehyde, benzeneacetylaldehyde, 3-(methylthio)-propanal was not only highly  
418 correlated with the low growth rate but also with the increased loss of culturability on agar. While  
419 intracellular NADH concentration was not measured in these retentostat studies, it could be that NADH

420 disbalance coincides with the emergence of VBNC populations and coinciding accumulation of aldehyde-  
421 volatiles under those conditions.

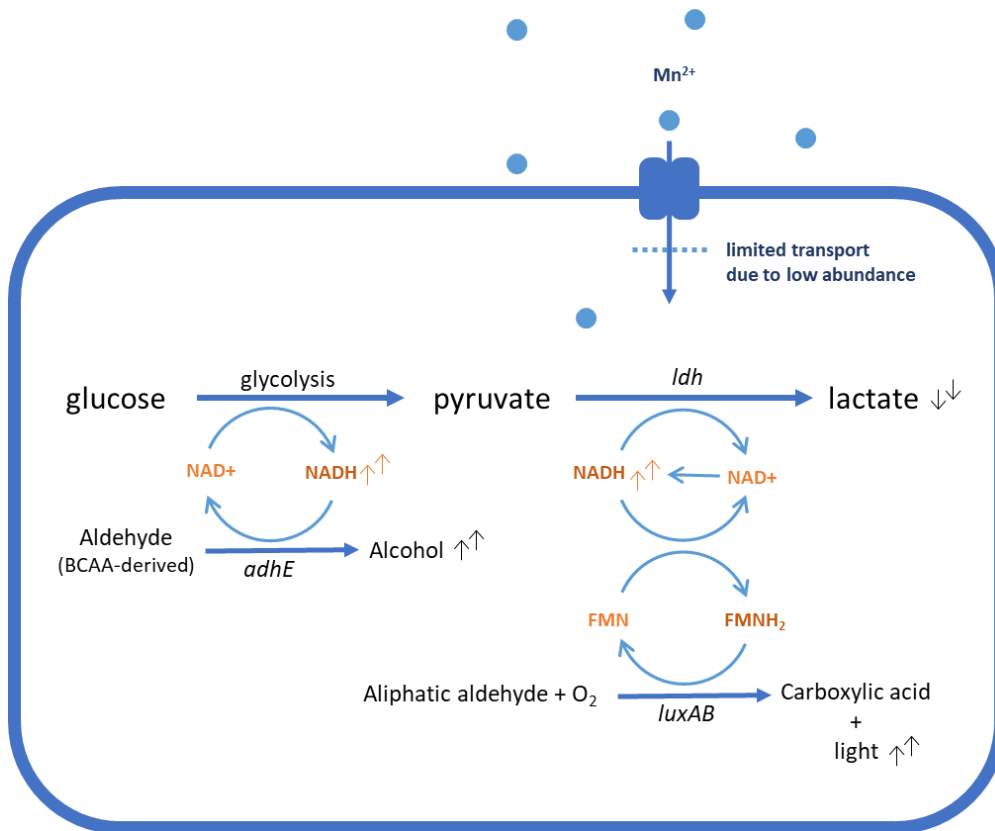

422

423 **Figure 6** Schematic simplification of the effect of manganese omission on the metabolism of TB-*L. lactis*  
424 NCDO712. Limited manganese import might reduce glycolysis flux or LDH activity, but prevents NADH  
425 depletion, and allows other NADH-dependent reactions to take place for a prolonged period. Increase (  $\uparrow$  )  
426 ) or decrease (  $\downarrow$  ) of metabolic compounds measured upon manganese omission are indicated.

427

428 Our study is relevant for biotechnological and fermentation purposes, especially when the metabolism of  
429 non-growing cells that rely on cofactor recycling is of interest. As demonstrated, the prolonged stability of  
430 acidification and NADH regeneration are potentially crucial for the transition toward non-culturable state.  
431 Such transition is potentially relevant for various applications where cells are stored under suboptimal  
432 conditions such as commercial starters and probiotic products. In line with other investigations of  
433 lactococci at near-zero growth (49), the distinct end-metabolite and its accumulated formation by viable  
434 but non-culturable lactococci substantiate their potential important role in flavor formation during ripening.  
435 This was exemplified by BCAA-derived volatiles that are particularly critical for the flavor characteristics  
436 of fermented foods. Aldehyde intermediates from BCAA catabolism are more potent flavor volatiles than  
437 their alcohol derivatives with an odor threshold that differs by two orders of magnitude (50). The prolonged  
438 aldehyde formation in cells that no longer acidify and presumably no longer generating substantial levels

439 of ATP imply that this metabolite formation is uncoupled from cellular energy status and growth and  
440 potentially very suitable for cell factory applications. Next to volatile production, the present study further  
441 highlights the relevance of our high-throughput non-growing model system for the investigation of starter  
442 cultures in cheese ripening where flavor formation by non-acidifying VBNC cells with limited protein  
443 synthesis can be mimicked. Finally, understanding the factors that influence the stability of prolonged  
444 metabolism through the presented TB model may provide new approaches in modulating the yield of  
445 desired compounds produced by non-growing cells.

## 446 **Conflict of Interest**

447 The project is organized by and executed under the auspices of TiFN, a public - private partnership on  
448 precompetitive research in food and nutrition. HB is employed by NIZO Food Research. The authors have  
449 declared that no competing interests exist in the writing of this publication. Funding for this research was  
450 obtained from Friesland Campina (Wageningen, The Netherlands), CSK Food Enrichment (Wageningen,  
451 The Netherlands) and the Top-sector Agri&Food.

## 452 **Author Contributions**

453 ADWN, MK and HB conceived and designed the study, ADWN, BvO, SB, SAB carried out the  
454 experiments, all authors analyzed the data; ADWN, MK and HB wrote the paper;

## 455 **Funding**

456 This study was funded by the Top Institute Food & Nutrition (TIFN, Program 16MF01, Wageningen, The  
457 Netherlands).

## 458 **Acknowledgments**

459 The authors would like to thank Roelie Holleman for the HPLC measurement of organic acids, Wilma  
460 Wesselink for the HS-SPME GC-MS measurement of volatiles, Peter Ruhdal Jensen who kindly provided  
461 strain MG1363(pAK80) and MG1363(pCPC75::atpAGD), as well as Jacques Vervoort for the constructive  
462 discussion.

## 463 **Associated data**

464 Supplementary Materials

465 Text S1: Supplementary methods, information and additional data

466 Text S1, DOCX file, 2.85MB

467 Supplementary Text S1.docx

468

469 Table S1: Complete list of proteins measured in manganese omitted compared to manganese

470 supplemented cultures.

471 Table S1, XLSX file, 0.4MB

472 Supplementary Table S1.xlsx

473

## 474 **References**

- 475 1. Kehres DG, Maguire ME. 2003. Emerging themes in manganese transport, biochemistry and  
476 pathogenesis in bacteria. FEMS Microbiol Rev. Elsevier.
- 477 2. Archibald FS, Duong MN. 1984. Manganese acquisition by *Lactobacillus plantarum*. J Bacteriol 158.
- 478 3. Nies DH. 2016. The biological chemistry of the transition metal transportome of: *Cupriavidus*  
479 *metallidurans*. Metallomics. Royal Society of Chemistry.
- 480 4. Cowan JA. 2002. Structural and catalytic chemistry of magnesium-dependent enzymes. BioMetals.  
481 Springer.
- 482 5. Vernon WB. 1988. The role of magnesium in nucleic-acid and protein metabolism. Magnesium.
- 483 6. Foster AW, Osman D, Robinson NJ. 2014. Metal preferences and metallation. J Biol Chem. American  
484 Society for Biochemistry and Molecular Biology Inc.
- 485 7. Irving H, Williams RJP. 1948. Order of stability of metal complexes. Nature 162:746-747.
- 486 8. Nierop Groot MN, Klaassens E, de Vos WM, Delcour J, Hols P, Kleerebezem M. 2005. Genome-based in  
487 silico detection of putative manganese transport systems in *Lactobacillus plantarum* and their genetic  
488 analysis. Microbiology 151:1229-1238.
- 489 9. Holland R, Pritchard GG. 1975. Regulation of the L-Lactate Dehydrogenase from *Lactobacillus casei* by  
490 Fructose-1,6-Diphosphate and Metal Ions JOURNAL OF BACTERIOLOGY.
- 491 10. Archibald FS, Fridovich I. 1981. Manganese, superoxide dismutase, and oxygen tolerance in some lactic  
492 acid bacteria. J Bacteriol 146.
- 493 11. Barnese K, Gralla EB, Valentine JS, Cabelli DE. 2012. Biologically relevant mechanism for catalytic  
494 superoxide removal by simple manganese compounds. Proc Natl Acad Sci U S A 109:6892-6897.

- 495 12. Nierop Groot MN, De Bont JAM. 1999. Involvement of manganese in conversion of phenylalanine to  
496 benzaldehyde by lactic acid bacteria. *Appl Environ Microbiol* 65:5590–5593.
- 497 13. Smit BA, Engels WJM, Alewijn M, Lommerse GTCA, Kippersluijs EAH, Wouters JTM, Smit G. 2004.  
498 Chemical Conversion of  $\alpha$ -Keto Acids in Relation to Flavor Formation in Fermented Foods. *J Agric Food*  
499 *Chem* 52:1263–1268.
- 500 14. Ward DE, Van Der Weijden CC, Van Der Merwe MJ, Westerhoff H V., Claiborne A, Snoep JL. 2000.  
501 Branched-chain  $\alpha$ -keto acid catabolism via the gene products of the bkd operon in *Enterococcus*  
502 *faecalis*: A new, secreted metabolite serving as a temporary redox sink. *J Bacteriol* 182:3239–3246.
- 503 15. Dijkstra AR. 2015. Spray drying of starter cultures: Diverse solutions within *Lactococcus lactis* to  
504 improve robustness.
- 505 16. Rangel DEN. 2011. Stress induced cross-protection against environmental challenges on prokaryotic  
506 and eukaryotic microbes. *World J Microbiol Biotechnol*. Springer.
- 507 17. Anjem A, Varghese S, Imlay JA. 2009. Manganese import is a key element of the OxyR response to  
508 hydrogen peroxide in *Escherichia coli*. *Mol Microbiol* 72:844–858.
- 509 18. Masuda A, Toya Y, Shimizu H. 2017. Metabolic impact of nutrient starvation in mevalonate-producing  
510 *Escherichia coli*. *Bioresour Technol* 245:1634–1640.
- 511 19. Wang W, Li S, Li Z, Zhang J, Fan K, Tan G, Ai G, Lam SM, Shui G, Yang Z, Lu H, Jin P, Li Y, Chen X, Xia  
512 X, Liu X, Dannelly HK, Yang C, Yang Y, Zhang S, Alterovitz G, Xiang W, Zhang L. 2020. Harnessing the  
513 intracellular triacylglycerols for titer improvement of polyketides in *Streptomyces*. *Nat Biotechnol*  
514 38:76–83.
- 515 20. Graf N, Altenbuchner J. 2014. Genetic engineering of *Pseudomonas putida* KT2440 for rapid and high-  
516 yield production of vanillin from ferulic acid. *Appl Microbiol Biotechnol* 98:137–149.
- 517 21. Fuchino K, Kalnenieks U, Rutkis R, Grube M, Bruheim P. 2020. Metabolic Profiling of Glucose-Fed  
518 Metabolically Active Resting *Zymomonas mobilis* Strains. *Metabolites* 10:81.
- 519 22. Gasson MJ. 1983. Plasmid complements of *Streptococcus lactis* NCDO 712 and other lactic streptococci  
520 after protoplast-induced curing. *J Bacteriol* 154:1–9.
- 521 23. Koebmann BJ, Solem C, Pedersen MB, Nilsson D, Jensen PR. 2002. Expression of genes encoding F1-  
522 ATPase results in uncoupling of glycolysis from biomass production in *Lactococcus lactis*. *Appl Environ*  
523 *Microbiol* 68:4274–4282.
- 524 24. Price CE, Branco Dos Santos F, Hesseling A, Uusitalo JJ, Bachmann H, Benavente V, Goel A, Berkhout  
525 J, Bruggeman FJ, Marrink SJ, Montalban-Lopez M, De Jong A, Kok J, Molenaar D, Poolman B, Teusink

- 526 B, Kuipers OP. 2019. Adaption to glucose limitation is modulated by the pleotropic regulator CcpA,  
527 independent of selection pressure strength. *BMC Evol Biol* 19:15.
- 528 25. Chen Y, Pelt-KleinJan E van, Olst B van, Douwenga S, Boeren S, Bachmann H, Molenaar D, Nielsen J,  
529 Teusink B. 2021. Proteome constraints reveal targets for improving microbial fitness in nutrient-rich  
530 environments. *Mol Syst Biol* 17:e10093.
- 531 26. Vizcaíno JA, Csordas A, Del-Toro N, Dianas JA, Griss J, Lavidas I, Mayer G, Perez-Riverol Y, Reisinger F,  
532 Ternent T, Xu QW, Wang R, Hermjakob H. 2016. 2016 update of the PRIDE database and its related  
533 tools. *Nucleic Acids Res* 44:D447–D456.
- 534 27. Nugroho ADW, Kleerebezem M, Bachmann H. 2020. A Novel Method for Long-Term Analysis of Lactic  
535 Acid and Ammonium Production in Non-growing *Lactococcus lactis* Reveals Pre-culture and Strain  
536 Dependence. *Front Bioeng Biotechnol* 8.
- 537 28. Bachmann H, Kleerebezem M, Van Hylckama Vlieg JET. 2008. High-throughput identification and  
538 validation of in situ-expressed genes of *Lactococcus lactis*, p. 4727–4736. *In Applied and*  
539 *Environmental Microbiology*. American Society for Microbiology (ASM).
- 540 29. Molenaar D, van Berlo R, de Ridder D, Teusink B. 2009. Shifts in growth strategies reflect tradeoffs in  
541 cellular economics. *Mol Syst Biol* 5:323.
- 542 30. Basan M, Hui S, Okano H, Zhang Z, Shen Y, Williamson JR, Hwa T. 2015. Overflow metabolism in  
543 *Escherichia coli* results from efficient proteome allocation. *Nature* 528:99–104.
- 544 31. Goel A, Eckhardt TH, Puri P, de Jong A, Branco dos Santos F, Giera M, Fusetti F, de Vos WM, Kok J,  
545 Poolman B, Molenaar D, Kuipers OP, Teusink B. 2015. Protein costs do not explain evolution of  
546 metabolic strategies and regulation of ribosomal content: does protein investment explain an anaerobic  
547 bacterial Crabtree effect? *Mol Microbiol* 97:77–92.
- 548 32. Koebmann BJ, Westerhoff H V, Snoep JL, Solem C, Pedersen MB, Nilsson D, Michelsen O, Jensen PR.  
549 2002. The extent to which ATP demand controls the glycolytic flux depends strongly on the organism  
550 and conditions for growth. *Mol Biol Rep* 29:41–45.
- 551 33. Garrigues C, Loubiere P, Lindley ND, Coccagn-Bousquet M. 1997. Control of the shift from homolactic  
552 acid to mixed-acid fermentation in *Lactococcus lactis*: Predominant role of the NADH/NAD<sup>+</sup> ratio. *J*  
553 *Bacteriol* 179:5282–5287.
- 554 34. Weissbach H, Etienne F, Hoshi T, Heinemann SH, Lowther WT, Matthews B, St. John G, Nathan C, Brot  
555 N. 2002. Peptide methionine sulfoxide reductase: Structure, mechanism of action, and biological  
556 function. *Arch Biochem Biophys* 397:172–178.

- 557 35. Nugroho ADW, Kleerebezem M, Bachmann H. 2020. A novel method for long-term analysis of lactic  
558 acid and ammonium production in non-growing *Lactococcus lactis* reveals pre-culture and strain  
559 dependence. *Front Bioeng Biotechnol* 8:1170.
- 560 36. Ganesan B, Stuart MR, Weimer BC. 2007. Carbohydrate starvation causes a metabolically active but  
561 nonculturable state in *Lactococcus lactis*. *Appl Environ Microbiol* 73:2498–2512.
- 562 37. Bachmann H, Santos F, Kleerebezem M, Van Hylckama Vlieg JET. 2007. Luciferase Detection during  
563 Stationary Phase in *Lactococcus lactis*. *Appl Environ Microbiol* 73:4704–4706.
- 564 38. Goel A, Santos F, De Vos WM, Teusink B, Molenaar D. 2012. Standardized Assay Medium To Measure  
565 *Lactococcus lactis* Enzyme Activities while Mimicking Intracellular Conditions  
566 <https://doi.org/10.1128/AEM.05276-11>.
- 567 39. Tong Y, Zhai Q, Wang G, Zhang Q, Liu X, Tian F, Zhao J, Zhang H, Chen W. 2017. System-wide  
568 analysis of manganese starvation-induced metabolism in key elements of *Lactobacillus plantarum*. *RSC*  
569 *Adv* 7:12959–12968.
- 570 40. Archibald FS, Fridovich I. 1981. Manganese and Defenses against Oxygen Toxicity in *Lactobacillus*  
571 *plantarum* Downloaded from JOURNAL OF BACTERIOLOGY.
- 572 41. Iyengar G V., Kasperek K, Feinendegen LE, Wang YX, Weese H. 1982. Determination of Co, Cu, Fe, Hg,  
573 Mn, Sb, Se and Zn in milk samples. *Sci Total Environ* 24:267–274.
- 574 42. Mendil D. 2006. Mineral and trace metal levels in some cheese collected from Turkey. *Food Chem*  
575 96:532–537.
- 576 43. Du Bray1 EA. Preliminary compilation of descriptive geoenvironmental mineral deposit models.
- 577 44. Crow' And VL, Pritchard GG. 1977. Fructose 1,6-Diphosphate-Activated L-Lactate Dehydrogenase from  
578 *Streptococcus lactis*: Kinetic Properties and Factors Affecting Activation Downloaded from JOURNAL OF  
579 BACTERIOLOGY.
- 580 45. Koebmann BJ, Westerhoff H V., Snoep JL, Nilsson D, Jensen PR. 2002. The glycolytic flux in *Escherichia*  
581 *coli* is controlled by the demand for ATP. *J Bacteriol* 184:3909–3916.
- 582 46. Park H, Hwang YS. 2008. Genome-wide transcriptional responses to sulfite in *Saccharomyces*  
583 *cerevisiae*. *J Microbiol* 46:542–548.
- 584 47. Serpaggi V, Remize F, Recorbet G, Gaudot-Dumas E, Sequeira-Le Grand A, Alexandre H. 2012.  
585 Characterization of the “ viable but nonculturable” (VBNC) state in the wine spoilage yeast  
586 *Brettanomyces*. *Food Microbiol* 30:438–447.
- 587 48. van Mastrigt O, Abee T, Lillevang SK, Smid EJ. 2018. Quantitative physiology and aroma formation of a

- 588 dairy *Lactococcus lactis* at near-zero growth rates. *Food Microbiol* 73:216–226.
- 589 49. van Mastrigt O, Gallegos Tejada D, Kristensen MN, Abee T, Smid EJ. 2018. Aroma formation during  
590 cheese ripening is best resembled by *Lactococcus lactis* retentostat cultures. *Microb Cell Fact* 17:1–8.
- 591 50. Smit G, Smit BA, Engels WJM. 2005. Flavour formation by lactic acid bacteria and biochemical flavour  
592 profiling of cheese products. *FEMS Microbiol Rev* 29:591–610.
- 593
